# Supplementary material
Source: publisher figshare collection journal article supplement (https://karger.figshare.com/articles/dataset/_/7987046)
Supplement: Supplementary file 1 [file 1]

Archive with 3 entries (3 files):
- 496549_S2.doc
- 496549_S3.doc
- 496549_S1.pdf
