# Supplementary material
Source: publisher figshare collection journal article supplement (https://karger.figshare.com/articles/dataset/_/7987046)
Supplement: Supplementary file 1 [file 1 › 496549_S1.pdf]

# Appendix 1

**Patient No.**

## **PULMONOLOGIST**

| Slide n° ...                                                                                                                                     |     |    |
|--------------------------------------------------------------------------------------------------------------------------------------------------|-----|----|
| Is the sample adequate?                                                                                                                          | YES | NO |
| If the sample is adequate, what is your cytologic diagnosis?<br>a) Reactive lymph node<br>b) Malignant lymph node<br>c) Granulomatous lymph node |     |    |

| Slide n° ...                                                                                                                                     |     |    |
|--------------------------------------------------------------------------------------------------------------------------------------------------|-----|----|
| Is the sample adequate?                                                                                                                          | YES | NO |
| If the sample is adequate, what is your cytologic diagnosis?<br>a) Reactive lymph node<br>b) Malignant lymph node<br>c) Granulomatous lymph node |     |    |

| Slide n° ...                                                                                                                                     |     |    |
|--------------------------------------------------------------------------------------------------------------------------------------------------|-----|----|
| Is the sample adequate?                                                                                                                          | YES | NO |
| If the sample is adequate, what is your cytologic diagnosis?<br>a) Reactive lymph node<br>b) Malignant lymph node<br>c) Granulomatous lymph node |     |    |

| Slide n° ...                                                                                                                                     |     |    |
|--------------------------------------------------------------------------------------------------------------------------------------------------|-----|----|
| Is the sample adequate?                                                                                                                          | YES | NO |
| If the sample is adequate, what is your cytologic diagnosis?<br>a) Reactive lymph node<br>b) Malignant lymph node<br>c) Granulomatous lymph node |     |    |

# Appendix 1

**Patient No.**

**PATHOLOGIST**

| Slide n° ...                                                                                                                                     |     |    |
|--------------------------------------------------------------------------------------------------------------------------------------------------|-----|----|
| Is the sample adequate?                                                                                                                          | YES | NO |
| If the sample is adequate, what is your cytologic diagnosis?<br>a) Reactive lymph node<br>b) Malignant lymph node<br>c) Granulomatous lymph node |     |    |

| Slide n° ...                                                                                                                                     |     |    |
|--------------------------------------------------------------------------------------------------------------------------------------------------|-----|----|
| Is the sample adequate?                                                                                                                          | YES | NO |
| If the sample is adequate, what is your cytologic diagnosis?<br>a) Reactive lymph node<br>b) Malignant lymph node<br>c) Granulomatous lymph node |     |    |

| Slide n° ...                                                                                                                                     |     |    |
|--------------------------------------------------------------------------------------------------------------------------------------------------|-----|----|
| Is the sample adequate?                                                                                                                          | YES | NO |
| If the sample is adequate, what is your cytologic diagnosis?<br>a) Reactive lymph node<br>b) Malignant lymph node<br>c) Granulomatous lymph node |     |    |

| Slide n° ...                                                                                                                                     |     |    |
|--------------------------------------------------------------------------------------------------------------------------------------------------|-----|----|
| Is the sample adequate?                                                                                                                          | YES | NO |
| If the sample is adequate, what is your cytologic diagnosis?<br>a) Reactive lymph node<br>b) Malignant lymph node<br>c) Granulomatous lymph node |     |    |
